# Supplementary material
Source: publisher figshare collection journal article supplement (https://asha.figshare.com/articles/dataset/_/22280845)
Supplement: Supplementary file 1 [file 1]

# VALI Caregiver SURVEY

---

## Start of Block: Intro

Q1.1

**Para completar la encuesta en español, seleccione "Español (America Latina)" en el botón de arriba.**

**Thank you for participating in this study for the VALI Lab at the University of Minnesota.**

VALI is an online, app-based language intervention for Spanish-speaking Latino families and children who are receiving Early Intervention services for communication delays. VALI helps caregivers\* support their child's talking by using Spanish (or English) in everyday activities.

Caregivers who use VALI will learn how to help their child talk. They will (1) receive resources via text messages and a phone application. They will also (2) have access to a coach by uploading short videos on an app for feedback.

We would like to hear your honest opinions on the intervention materials and process. The information that you provide will help us improve Early Intervention services for children and families.

**The following survey will take about 30 minutes, and you will earn \$20 for completing the full survey.**

If you have any questions about the survey, please email us at [vali@umn.edu](mailto:vali@umn.edu)

We really appreciate your input.

\*Caregiver: the person(s) directly involved in daily interactions with the child (usually a parent, grandparent, aunt or uncle, neighbor, or cousin)

Q1.2 Please enter your full name here:

---

Q1.3 If you would like to receive an electronic gift card for your participation, please enter your email here:

---

Q1.4 Please select the type of electronic gift card you would like:

- ☐ Target
- ☐ Amazon

End of Block: Intro

---

Start of Block: Component 3 Strategies

Q2.1 VALI gives caregivers 6 strategies that they can use to help their child talk. Caregivers will **receive** cards with instructions and descriptions for each **strategy, like this:**

You may view all strategy cards here:  
6 VALI Strategies

The following questions will be about these 6 strategies. You will earn \$10 after completing this section of the survey.

**Q2.2 The following questions will be about the strategy "Observe and Respond."**

Q2.3 Caregivers will receive the following card to describe the strategy. Please click once to highlight areas you LIKE in **green**. Click twice to highlight areas you do NOT LIKE in **red**.

<Redacted for publication.>

Q2.4 Thank you for your honest feedback. Please describe what you do not like about the strategy card for Observe and Respond.

---

Q2.5

**Por favor marque las palabras o frases de la descripción que NO le suenan bien o que**

**NO entiende. Please highlight any words or phrases that DO NOT sound right or that you DO NOT understand.**

Q2.6 Thank you for your honest feedback. Please describe why these words do not sound right or are hard to understand.

---

Q2.7 Please rate how much you agree or disagree with the following statements.

Q2.8 I would feel **comfortable** using the Observe and Respond strategy with my child.

- ☐ Strongly Disagree
- ☐ Disagree
- ☐ Somewhat Disagree
- ☐ Somewhat Agree
- ☐ Agree
- ☐ Strongly Agree

Q2.9 It would be **easy** for me to use Observe and Respond while talking with my child (in Spanish or English).

- ☐ Strongly Disagree
- ☐ Disagree
- ☐ Somewhat Disagree
- ☐ Somewhat Agree
- ☐ Agree
- ☐ Strongly Agree

Q2.10 Using Observe and Respond will **help** my child talk.

- ☐ Strongly Disagree
- ☐ Disagree
- ☐ Somewhat Disagree
- ☐ Somewhat Agree
- ☐ Agree
- ☐ Strongly Agree

Q2.11 Thank you for your honest feedback. Please tell us why you disagree.

---

Q2.12 Please rank the following Spanish translations of the title "Observe and Respond"

- \_\_\_\_\_ Observa y Responde
- \_\_\_\_\_ Observa y Reacciona
- \_\_\_\_\_ Reconoce y Responde
- \_\_\_\_\_ Other

Q2.13 The following video is an example of Observe and Respond. The following questions will be about this video model.

Q2.14 The video model makes the Observe and Respond strategy easier to understand.

- ☐ Strongly Disagree
- ☐ Disagree
- ☐ Somewhat Disagree
- ☐ Somewhat Agree
- ☐ Agree
- ☐ Strongly Agree

Q2.15 I could easily access this video if a link was sent to my phone.

- ☐ Strongly Disagree
- ☐ Disagree
- ☐ Somewhat Disagree
- ☐ Somewhat Agree
- ☐ Agree
- ☐ Strongly Agree

Q2.16 I can relate to the caregivers in this video (when keeping their culture and language use in mind.)

- ☐ Strongly Disagree
- ☐ Disagree
- ☐ Somewhat Disagree
- ☐ Somewhat Agree
- ☐ Agree
- ☐ Strongly Agree

Q2.17 The home environment of the family in this video is similar to mine.

- ☐ Strongly Disagree
- ☐ Disagree
- ☐ Somewhat Disagree
- ☐ Somewhat Agree
- ☐ Agree
- ☐ Strongly Agree

Q2.18 Thank you for your honest feedback. Please tell us why you disagree.

---

Q2.19 **The following questions will be about the strategy "Repeat and Add."**

Q2.20 Caregivers will receive the following card to describe the strategy. Please click once to highlight areas you LIKE in **green**. Click twice to highlight areas you do NOT LIKE in **red**.

<Redacted for publication.>

Q2.21 Thank you for your honest feedback. Please describe what you do not like about the strategy card for Repeat and Add.

---

Q2.22 **Por favor marque las palabras o frases de la descripción que NO le suenan bien o que NO entiende. Please highlight any words or phrases that DO NOT sound right or that you DO NOT understand.**

Q2.23 Thank you for your honest feedback. Please describe why these words do not sound right or are hard to understand.

---

Q2.24 Please rate how much you agree or disagree with the following statements.

Q2.25 I would feel **comfortable** using Repeat and Add with my child.

- ☐ Strongly Disagree
- ☐ Disagree
- ☐ Somewhat Disagree
- ☐ Somewhat Agree
- ☐ Agree
- ☐ Strongly Agree

Q2.26 It would be **easy** for me to use Repeat and Add while talking with my child (in Spanish or English).

- ☐ Strongly Disagree
- ☐ Disagree
- ☐ Somewhat Disagree
- ☐ Somewhat Agree
- ☐ Agree
- ☐ Strongly Agree

Q2.27 Using Repeat and Add will **help** my child talk.

- ☐ Strongly Disagree
- ☐ Disagree
- ☐ Somewhat Disagree
- ☐ Somewhat Agree
- ☐ Agree
- ☐ Strongly Agree

Q2.28 Thank you for your honest feedback. Please tell us why you disagree.

---



Q2.29 Please rank the following Spanish translations of the title "Repeat and Add"

- \_\_\_\_\_ Repite y Añade  
 \_\_\_\_\_ Repite y Agrega  
 \_\_\_\_\_ Imita y Aumenta  
 \_\_\_\_\_ Other

**Q2.30 The following questions will be about the strategy "Provide a Choice."**

Q2.31 Caregivers will receive the following card to describe the strategy. Please click once to highlight areas you LIKE in **green**. Click twice to highlight areas you do NOT LIKE in **red**.

<Redacted for publication.>

Q2.32 Thank you for your honest feedback. Please describe what you do not like about the strategy card for Provide a Choice.

---

**Q2.33 Por favor marque las palabras o frases de la descripción que NO le suenan bien o que NO entiende. Please highlight any words or phrases that you DO NOT sound right or that you DO NOT understand.**

Q2.34 Thank you for your honest feedback. Please describe why the words do not sound right or are hard to understand.

---

Q2.35 Please rate how much you agree or disagree with the following statements.

Q2.36 I would feel **comfortable** using Provide a Choice with my child.

- ☐ Strongly Disagree
- ☐ Disagree
- ☐ Somewhat Disagree
- ☐ Somewhat Agree
- ☐ Agree
- ☐ Strongly Agree

Q2.37 It would be **easy** for me to use Provide a Choice while talking with my child (in Spanish or English).

- ☐ Strongly Disagree
- ☐ Disagree
- ☐ Somewhat Disagree
- ☐ Somewhat Agree
- ☐ Agree
- ☐ Strongly Agree

Q2.38 Using Provide a Choice will **help** my child talk.

- ☐ Strongly Disagree
- ☐ Disagree
- ☐ Somewhat Disagree
- ☐ Somewhat Agree
- ☐ Agree
- ☐ Strongly Agree

Q2.39 Thank you for your honest feedback. Please tell us why you disagree.

---

Q2.40 Please rank the following Spanish translations of the title "Provide a Choice."

- \_\_\_\_\_ Ofrece Opciones
- \_\_\_\_\_ Provee Opciones
- \_\_\_\_\_ Ofrece Una Opción
- \_\_\_\_\_ Other

**Q2.41 The following questions will be about the strategy "Give Small Portions."**

Q2.42 Caregivers will receive the following card to describe the strategy. Please click once to highlight areas you LIKE in **green**. Click twice to highlight areas you do NOT LIKE in **red**.

<Redacted for publication.>

Q2.43 Thank you for your honest feedback. Please describe what you do not like about the strategy card for Give Small Portions.

---

Q2.45 Thank you for your honest feedback. Please describe why these words do not sound right or are hard to understand.

---

Q2.46 Please rate how much you agree or disagree with the following statements.

Q2.47 I would feel **comfortable** using this Give Small Portions with my child.

- ☐ Strongly Disagree
- ☐ Disagree
- ☐ Somewhat Disagree
- ☐ Somewhat Agree
- ☐ Agree
- ☐ Strongly Agree

Q2.48 It would be **easy** for me to use Give Small Portions while talking with my child (in Spanish or English).

- ☐ Strongly Disagree
- ☐ Disagree
- ☐ Somewhat Disagree
- ☐ Somewhat Agree
- ☐ Agree
- ☐ Strongly Agree

Q2.49 Using Give Small Portions will **help** my child talk.

- ☐ Strongly Disagree
- ☐ Disagree
- ☐ Somewhat Disagree
- ☐ Somewhat Agree
- ☐ Agree
- ☐ Strongly Agree

Q2.50 Thank you for your honest feedback. Please tell us why you disagree.

---

Q2.51 Please rank the following Spanish translations of the title "Give Small Portions"

- \_\_\_\_\_ Porciones Pequeñas
- \_\_\_\_\_ Cantidades Pequeñas
- \_\_\_\_\_ Repartos Pequeños
- \_\_\_\_\_ Other

Q2.52 **The following questions will be about the strategy "Show it Before you Give it."**

Q2.53 Caregivers will receive the following card to describe the strategy. Please click once to highlight areas you LIKE in **green**. Click twice to highlight areas you do NOT LIKE in **red**.

<Redacted for publication.>

Q2.54 Thank you for your honest feedback. Please describe what you do not like about the strategy card for Show it Before you Give it.

---

Q2.55 **Por favor marque las palabras o frases de la descripción que NO le suenan bien o que NO entiende. Please highlight any words or phrases that you DO NOT sound right or that you DO NOT understand.**

Q2.56 Thank you for your honest feedback. Please describe why these words do not sound right or are hard to understand.

---

Q2.57 Please rate how much you agree or disagree with the following statements.

Q2.58 I would feel **comfortable** using this Show it before you give it with my child.

- ☐ Strongly Disagree
- ☐ Disagree
- ☐ Somewhat Disagree
- ☐ Somewhat Agree
- ☐ Agree
- ☐ Strongly Agree

Q2.59 It would be **easy** for me to use Show it before you give it while talking with my child (in Spanish or English).

- ☐ Strongly Disagree
- ☐ Disagree
- ☐ Somewhat Disagree
- ☐ Somewhat Agree
- ☐ Agree
- ☐ Strongly Agree

Q2.60 Using Show it before you give it will **help** my child talk.

- ☐ Strongly Disagree
- ☐ Disagree
- ☐ Somewhat Disagree
- ☐ Somewhat Agree
- ☐ Agree
- ☐ Strongly Agree

Q2.61 Thank you for your honest feedback. Please tell us why you disagree.

---

Q2.62 Please rank the following Spanish translations of the title "Show it before you give it"

- \_\_\_\_\_ Muéstralo antes de darlo
- \_\_\_\_\_ Enséñalo antes de darlo
- \_\_\_\_\_ Provoca una Petición
- \_\_\_\_\_ Other

Q2.63 The following questions will be about the strategy "Take turns."

Q2.64 Caregivers will receive the following card to describe the strategy. Please click once to highlight areas you LIKE in **green**. Click twice to highlight areas you do NOT LIKE in **red**.

<Redacted for publication.>

Q2.65 Thank you for your honest feedback. Please describe what you do not like about the strategy card for Take Turns.

---

Q2.66 Por favor marque las palabras o frases de la descripción que NO le suenan bien o que NO entiende. Please highlight any words or phrases that you DO NOT sound right or that you DO NOT understand.

Q2.67 Thank you for your honest feedback. Please describe why these words do not sound right or are hard to understand.

---

Q2.68 Please rate how much you agree or disagree with the following statements.

Q2.69 I would feel **comfortable** using Take Turns with my child.

- ☐ Strongly Disagree
- ☐ Disagree
- ☐ Somewhat Disagree
- ☐ Somewhat Agree
- ☐ Agree
- ☐ Strongly Agree



Q2.70 It would be **easy** for me to use Take Turns while talking with my child (in Spanish or English).

- ☐ Strongly Disagree
- ☐ Disagree
- ☐ Somewhat Disagree
- ☐ Somewhat Agree
- ☐ Agree
- ☐ Strongly Agree

Q2.71 Using Take Turns will **help** my child talk.

- ☐ Strongly Disagree
- ☐ Disagree
- ☐ Somewhat Disagree
- ☐ Somewhat Agree
- ☐ Agree
- ☐ Strongly Agree

Q2.72 Thank you for your honest feedback. Please tell us why you disagree.

---

Q2.73 Please rank the following Spanish translations of the title "Take Turns"

- \_\_\_\_\_ Toma de Turnos
- \_\_\_\_\_ Tome Turnos
- \_\_\_\_\_ Turnarse
- \_\_\_\_\_ Other

**End of Block: Component 3 Strategies**

---

**Start of Block: Continue 1**

Q3.1 Congratulations! You just earned \$10 by completing the first section. Would you like to continue to the next section and earn \$5 more?

☐ Yes

☐ No

**End of Block: Continue 1**

---

**Start of Block: Component 4 Coaching**

Q4.1

In VALI, families will connect with a bilingual speech-language therapist "coach". The coach will support caregivers as they learn to use the VALI language strategies, and caregivers will be able to ask questions and receive support from the coach.

Please think about your current **experience** supporting your child's talking and answer the questions below.

Q4.2 What resources have you used when you have a question or concern about your child's talking (in Spanish or English)? (Please select all that apply)

- ☐ Talk to a Someone (please list) \_\_\_\_\_
- ☐ Internet Search
- ☐ Specific Websites \_\_\_\_\_
- ☐ Books
- ☐ Magazines
- ☐ Television
- ☐ Social Media
- ☐ YouTube
- ☐ Other \_\_\_\_\_

Q4.3 What is your preferred way to get information about your child's talking? (select one)

- ☐ Talk to Someone (please list) \_\_\_\_\_
- ☐ Internet Search
- ☐ Specific Websites \_\_\_\_\_
- ☐ Books
- ☐ Magazines
- ☐ Television
- ☐ Social Media
- ☐ YouTube
- ☐ Other \_\_\_\_\_

**Q4.4 In VALI, families will connect with a bilingual speech-language therapist "coach" using video recordings. Families will record brief videos (~5 minutes) talking with their child in daily activities and send the videos to their coach.** The coach will support caregivers as they learn to use the VALI language strategies by responding to each video.

**The following questions will be about video coaching.**

Q4.5 Please rate how much you agree or disagree with the following statements.

Q4.6 It would be easy for me to use my phone to **record** videos of me and my child talking during our daily activities.

- ☐ Strongly Disagree
- ☐ Disagree
- ☐ Somewhat Disagree
- ☐ Somewhat Agree
- ☐ Agree
- ☐ Strongly Agree

Q4.7 I could easily **send** short videos to a coach by using my phone or computer.

- ☐ Strongly Disagree
- ☐ Disagree
- ☐ Somewhat Disagree
- ☐ Somewhat Agree
- ☐ Agree
- ☐ Strongly Agree

Q4.8 I am comfortable sharing my video recordings with a coach.

- ☐ Strongly Disagree
- ☐ Disagree
- ☐ Somewhat Disagree
- ☐ Somewhat Agree
- ☐ Agree
- ☐ Strongly Agree

Q4.9 Sharing my videos with a coach will help me support my child's talking (in Spanish or English).

- ☐ Strongly Disagree
- ☐ Disagree
- ☐ Somewhat Disagree
- ☐ Somewhat Agree
- ☐ Agree
- ☐ Strongly Agree

Q4.10 Getting feedback from a coach would help me use the VALI strategies (in Spanish or English).

- ☐ Strongly Disagree
- ☐ Disagree
- ☐ Somewhat Disagree
- ☐ Somewhat Agree
- ☐ Agree
- ☐ Strongly Agree

Q4.11 Making a plan about when I will use the VALI strategies (in Spanish or English) would help me use them more.

- ☐ Strongly Disagree
- ☐ Disagree
- ☐ Somewhat Disagree
- ☐ Somewhat Agree
- ☐ Agree
- ☐ Strongly Agree

Q4.12 Thank you for your honest feedback. Please tell us why you disagree.

---

Q4.13 How would you like to communicate with a coach as part of VALI? (Please select all that apply)

- ☐ Phone Call
- ☐ Text Message
- ☐ Email
- ☐ Send Videos and Receive a Video Response
- ☐ Whatsapp
- ☐ Another messaging app \_\_\_\_\_
- ☐ Other \_\_\_\_\_

Q4.14 Please rank the following Spanish translations for the speech-language therapist coach (for the purposes of the VALI intervention)

- \_\_\_\_\_ Guía
- \_\_\_\_\_ Entrenador
- \_\_\_\_\_ Patóloga
- \_\_\_\_\_ Terapeuta
- \_\_\_\_\_ Terapista
- \_\_\_\_\_ Other

Q4.15 Please add any additional comments or questions you may have about using video coaching.

\_\_\_\_\_

**End of Block: Component 4 Coaching**

**Start of Block: Continue 2**



Q5.1 Congratulations! You just earned \$5 by completing the second section. You have earned a total of \$15. Would you like to continue to the next section and earn \$5 more?

☐ Yes

☐ No

*Skip To: End of Survey If Congratulations! You just earned \$5 by completing the second section. You have earned a total of... = No*

**End of Block: Continue 2**

---

**Start of Block: Component 1 Socio-Linguistic Pride**

Q6.1 Caregivers who use VALI will understand the importance of cultural pride and learn to support their children's bilingualism. The following questions will be about this information.

**Q6.2 La siguiente lista contiene mensajes de texto que recibirán los padres o tutores sobre el orgullo cultural y bilingüismo. Por favor marque cualquier parte de los mensajes de texto que NO le suene bien o NO entienda.**

**NOTA: puede marcar la frase completa o secciones individuales.**

**The following is a list of text messages that will be sent to caregivers about Cultural Pride & Bilingualism. Please highlight any parts of these text messages that DO NOT sound right or that you DO NOT understand.**

**NOTE: you may highlight the entire phrase or individual words.**

Q6.3 Thank you for your honest feedback. Please describe why these words are difficult to understand or do not sound right.

---

**Q6.4 With this information in mind, please rate how much you agree or disagree with the following statements.**

Q6.5 Getting messages about cultural pride and bilingualism as a text would work well for me.

- ☐ Strongly Disagree
- ☐ Disagree
- ☐ Somewhat Disagree
- ☐ Somewhat Agree
- ☐ Agree
- ☐ Strongly Agree

Q6.6 The messages about cultural pride and bilingualism would encourage me to use Spanish with my child.

- ☐ Strongly Disagree
- ☐ Disagree
- ☐ Somewhat Disagree
- ☐ Somewhat Agree
- ☐ Agree
- ☐ Strongly Agree

Q6.7 Speaking Spanish with my child will help my child talk.

- ☐ Strongly Disagree
- ☐ Disagree
- ☐ Somewhat Disagree
- ☐ Somewhat Agree
- ☐ Agree

☐ Strongly Agree

Q6.8 Thank you for your honest feedback. Please tell us why you disagree.

---

End of Block: Component 1 Socio-Linguistic Pride

---

Start of Block: Component 2 Language Nutrition

**Q7.1 VALI informs caregivers about the importance of providing *Language Nutrition* for their children. *Language Nutrition* refers to the rich, back-and-forth language interactions between a caregiver and child (in Spanish or English). Just as healthy food feeds a growing body, *Language Nutrition* feeds a child's brain.**

**Q7.2 La siguiente lista contiene mensajes de texto que recibirán los padres o tutores sobre la *Nutrición del Lenguaje*. Por favor marque cualquier parte de los mensajes de texto que NO le suene bien o NO entienda.**

**NOTA:** puede marcar la frase completa o partes individuales.

**The following is a list of text messages that will be sent to caregivers about *Language Nutrition*. Please highlight any parts of these text messages that DO NOT sound right or that you DO NOT understand.**

**NOTE:** you may highlight the entire phrase or individual words.

**Q7.3 Thank you for your honest feedback. Please describe why these words are difficult to understand or do not sound right.**

---

**Q7.4 With this information in mind, please rate how much you agree or disagree with the following statements.**

Q7.5 Getting text reminders to use Language Nutrition would work well for me.

- ☐ Strongly Disagree
- ☐ Disagree
- ☐ Somewhat Disagree
- ☐ Somewhat Agree
- ☐ Agree
- ☐ Strongly Agree

Q7.6 It would be easy for me to use Language Nutrition with my child (in Spanish or English) during our daily activities.

- ☐ Strongly Disagree
- ☐ Disagree
- ☐ Somewhat Disagree
- ☐ Somewhat Agree
- ☐ Agree
- ☐ Strongly Agree

Q7.7 The messages about Language Nutrition would encourage me to talk with my child during our daily activities.

- ☐ Strongly Disagree
- ☐ Disagree
- ☐ Somewhat Disagree
- ☐ Somewhat Agree
- ☐ Agree
- ☐ Strongly Agree

Q7.8 Using Language Nutrition would help my child talk.

- ☐ Strongly Disagree
- ☐ Disagree
- ☐ Somewhat Disagree
- ☐ Somewhat Agree
- ☐ Agree
- ☐ Strongly Agree

Q7.9 Thank you for your honest feedback. Please tell us why you disagree.

---

Q7.10 Do you have any other comments about the VALI intervention that you would like to share?

---

---

---

End of Block: Component 2 Language Nutrition
