# Supplementary material
Source: publisher figshare collection journal article supplement (https://asha.figshare.com/articles/dataset/_/22280845)
Supplement: Supplementary file 2 [file 1]

## **Example Questions and Prompts for Focus Groups with SLPs**

### **Strategies**

Please tell me what you think about the strategies and their cards.

- We are particularly interested in knowing what you may not like about them? Is there anything that stands out?
  - Think about which strategies may not be as natural for families who use a more interdependent (collectivist) vs independent approach to caregiving. Have you noted this about any of the strategies?
    - (Probe) In other words, which of these strategies (traditionally designed with/for White, English-speaking families) may not be as successful with Spanish-speaking Latino families?
- Which parts of the strategies may be difficult to understand?
- How do you think caregivers will respond to the families depicted in the pictures and videos?
- How do you see yourselves using strategies when working with caregivers?
  - At the beginning of the intervention process, should practitioners or families choose with strategies to start with?
  - As the intervention process unfolds, should strategies be randomly selected or build off one another?
- What components of the strategy cards do you think would be most useful?
  - (Icons, definitions, picture examples, video examples, what to do if it doesn't work)
  - What would be the least useful?
- Is there anything missing in the strategies and/or their cards that you would like to see?

### **Coaching with Flip**

Please tell us about your experience testing Flip for the purposes of this intervention.

- When looking at this webpage and its features, what do you think will be the most useful for practitioners?
- What do you think will be the most useful for caregivers?
- What will be the most challenging about this system for practitioners and or caregivers?
- What were some of the problems you encountered while using Flip?

### **Coaching Manual**

Please share your thoughts on the VALI coaching manual.

- What did you find most helpful from the coaching manual?
- What is missing from the coaching manual and procedures provided by VALI?
- Is there anything you would like to see in order to better understand or implement the intervention?

### **Technology Use**

We would also like to hear about your own personal experiences with technology in your practices.

- In what ways has technology been helpful for you in communicating with caregivers in Early Intervention?

- What are your preferred methods? What are caregivers' preferred methods?
- Have you used asynchronous video coaching (sending and/or receiving videos) with caregivers to show models or to provide feedback?
  - What went well?
  - What was challenging?
  - If you haven't used asynchronous video coaching:
    - What are some possible advantages/disadvantages of asynchronous video-based coaching?

## **Summary**

(Give summary of main points)

- What would you like to add to that summary? Does it reflect the conversation you heard?
- What would you change about the summary?
- Are there any big points or ideas that should be highlighted?
